# Supplementary material for: High Temperature Induces Expression of Tobacco Transcription Factor NtMYC2a to Regulate Nicotine and JA Biosynthesis
Source: PubMed Central journal article supplement (PMC5081390; doi:10.3389/fphys.2016.00465), 2016-10-27
Supplement: Presentation2.pdf [file Presentation2.pdf]

>Ntab0305800 Nicotiana tabacum 3KB Upstream sequence, expressed protein, similar to Probable linoleate 9S-lipoxygenase 5 OS=Solanum tuberosum GN=LOX1.5 PE=2 SV=1

CAAAACTTGACAAGTAACTACAGCAGTATTAATGTTGTAGCCTTTTAGGTGCCAACAAAT  
AAATATTTGGGGAAGAGGCTGTTTGTGATCATACTCATATAACATAAACTTAGCCGCGT  
GCATTATATGACCGTCCTCGTCTTGCCTATTAATTAGAGTATGATCTTCAATCTCTC  
TAAACATCACCTATCACTATATATTGAGGCTATCCATTGTCAATTTACCTCTATTTGACAA  
TTTCATACTATAATATAATTACTCATGAATAGTTTGTATATTCAGACAAAATTTGAGTTC  
TCTAAAGCTGGGGATTCTTTAATCTCACATGTACATACATTGACCTACAACTTCTAACA  
CAAAAAACGAATCTAATGTAAGTCTATTAACAACGACTAAGTTAATTTCTCCTTATAAGT  
TTAGTGTGCTTGTATAGATAGTTTAATTTGCTTGTGTTGTGTTATGTTCTTTGCTAGCT  
AAATCTTCATGGATTCTAAAAGATTATAAGCCCTTTTCTAGATTAATTAATTGCAATTT  
TACTTCATGTGATTTAAGTCGACTTCTTTGCTTTAATGCCTTCAAATTATTATCGCGG  
CGCATCTTATACAGATGCATTGTATTTGGATGTCTATAGAAGATGTAGCCTAACCATCTT  
GGACCACATTCTCTCACTTTATCTTTATGACTACATAGAGGACAAGATATATACTTTT  
CTAAAATTTTATCGTATAATCCGTAAATTTAATACCACGATACTTTACAGAATTAAGAAT  
ATCGCCTTTGTTCTTATAAATCAGAGTAGAGGAGCTCTTCTCCACTCGTTGGCATATTT  
CATCTCCTTAATATAATATTAATAATAATCTCGGTGAGCCATACTCTCTCAATCTCTCC  
AAGTTGCTTTTAGACCTCTATAAGGATACTATTTGGAGTAAAACAAATTGCTAAACCCTC  
ATATTTTTTCCCTTTCATGACCATTTATTTCCCTATATATAGTTCTATGAGTGCATGTA  
ACGCTCCCGTGTGACAAAATATAAACGTATAAAATTATCTCATAATTGAAAGTACATG  
TATTTCTACAAAATAGAATTGTTTCTAGCTATAGTAAAATTCTCCATAGGAGAGTAACTA  
AATTTAATCAAAATTTAGTCCATAGTTACGTTGGGTAGTGAACTAGAATGGAGTGAACC  
ATTACTAAGATTGTTATTCTTAAAAATGCTACTAGCAAATAGCAATAGGCTCTATATTCA  
TATCAATAGCAGCACGCATCTTGTGATGAAAATTGTTGATTATTCAATCAAAATTTAA  
TGCTCAACTATACTTATATGGAGATCCATCATTGACATCAATTGAGTTTATATATAATT  
TTGTACCATAGGTTGTATATATAAAAATAAAAATAGTATTGATGCATTTGAATAATAAA  
AAAGAGAAGAGAAAGGATTTTGACAAGAAAGGCCAAAAAATTTCATAGAGGAATTGAACA  
GAAAAATTAATATTAGGATTCAAATCACTCCACTTGTTTGTGCTTGTGGGGAAGAATTGA  
CCACATAGACAACAAGAGAAAATAAATTTGAAATGCATTTAATTGGCTATGATCAGCTTC  
CTTACTCATATCCTACAAGAAAAGAGGAAAAGTATTATTGGAAGGGGCTTTTCTAGTTT  
GAAAGTTCAGAAGAAGATGGCAAATGACTTTTCCAAGTCAGAGTCGAACATATGACTATT  
TCCTAAAGCATTTTAATTTTAAATAAACACATATACAGTCAAACCTCTCTATAACATGTT  
TGTTCCGAAATTTTGTACTGCTATAGTAAAGTGTGTTATAGAAAACATATATATTATA  
ACATGCATAATATAACTCGGTCTGAGAAAATTCGGATTTTAAAATAAATGACTATT  
ATATAGGGATATTGTTATAGACAACTGATTGTAGTAGCGTCGTACACTTAATCTAAAC  
GATGCATGTGGGTAATTTTGTATAGACAACTCAACGTCAAAAAAGTAATTAGAAAG  
GCAATACACGAGTCTTATTAGGGTAAAAAACATACTATAACTATTGAGGTAATCATCTG  
ATTGAAATTACTATTATAAATTGTAACAATAGAACAATACTACGTAACCAAAGTGTTTTT  
CTAAGAATGAGGGTAAATTACACGCACGCGGTGTTTATCAAACAAATGAAGAAGAGCA  
ATGGATAAATGTTCAAAAATGATAATTTTATTTACCATCTACATACAATGTGTAATACT  
TTCACATCACTCCTTGCAAGTTGCAACTAATTAAGTACACAATTTTGTAAATATTACAAC  
AATTCTAATCGTTTTGAAATGAGATGCAAACGCATCAAATTACCTCGGCAAAGATGGAAT  
TTCACGGCACAATATAACAAAGCAAACTACGGAGTTTGGACGATTTTGGACGAATCGT  
TTTTTTTTGGGGAAAAAATTTTTGAGGAAAAGCTTGTATGTTTTACGGATGTTT

CAAATATTAAACAACCTTATTTTAGTGTAGAAATTAGATAAACATGAATAACAGATAATGA  
ATAAGTATTTTCAGAATCACTCCAACCTAAGATTGACGTGTAGATTTTGTAGAAAGGTAAAA  
GAAATTCATTTGGGCCCAAGAATTATCCACGTAATAAACCTGTGCAGACATTAATTGCT  
GTAATAATTTATCCGCATGAGTATTTGTTTTAATAAATAAAAGGATAATAAAGACCAATA  
TGGACAGACGATAGCTAGACAGGAAAGTTGGAATATAGAGATGGCTTTTGTATTTTCTT  
TTTTCCCTTTTTTATTGTTTTCTTTATTCTCAACTAGACAACCTACTTGTCTTGCTAT  
AAATATCAGATTTCTAGTTAGAACTTCACAACACAAATTAATTAACCTCATCTAAAT  
TCTATTTTCTTTCGTTTTCTTGGAAAGTTATTGAGAGAGAAAGTTATCAAACAGTTAATA

>Ntab0018690 Nicotiana tabacum 3KB Upstream sequence, expressed protein, similar to Allene  
oxide synthase, chloroplastic OS=Arabidopsis thaliana GN=CYP74A PE=1 SV=3

TTATAGCCCCGGGCGAACACTGCGATACCAGCGTCATCATCCATGGAACGGTGGGCACGA  
AGGGCGTGGGTGGCTCTGATACCATTGATACAACCTAAGGAGAACCACACCCCAAAGC  
TAACTATTAAGGTGGGAGAGCCCAAGGCTATATAACCCACATCAGCACATTGCAATAC  
GGATGTGGGACTCAAGTCTCATACCTTGAATGGACCATAACACCTTATAGACTAAAAAA  
GAAGATTATCTTATAGATTTTCTATCATCAAGATTCTCAATTTTGTATTTTGTAGCTTG  
CATGTTATTGTTGTTACTATTTATTTATTTTGGATTCAAGTTTAGGATCTCGTAT  
GAGATGTACATAGATTATTTCTTTCGTTTCTGCGGAGAGGATTCGGCCTTTGGACGTGA  
CAAGAGAAAGAAGAGACGGGCTAGAGAAACAGAAAAACGAAGAAATACAGATTTTTTTTA  
AAAAAACTTGACCTAGGTGCATAATAAAATTGAATTTTAAGGTATATGCATAAAATTGA  
ACACTGACACTGAACCTTGGAACTCAAATTCAAGAAAGAAGTACCATATTGTACATACA  
GTGATACATTTGTTAAAATGGTTCGTAAACAATTAAGCTCTTGGTAGTGATAATTATTA  
CTACTAATTTGTTTCAATTTAGACGGCGCACTTTTCTATTTGTCTGTTCTAAAAAAA  
AATATATTTCTACAATTAATAAATAATTAGAATTTAAAATCTTAATTTTGGGACACCCCA  
ATTTCCGATAAGGTGAATCGAGCAAGAGACGTGATGATAAGGAGCCGGAATCGAGGCAAG  
TACCTTTTATAACCACACAAATGTCATGATCCACAAAATTTTAAGACAACAAATTTCA  
AAAGTCTTTTTTTTCTTAAAATCATGCCGAGCCAACTATCTTATCTAAATTGAACTAC  
TTTCTATATATTTTGCCATGTGATACACAACCCTCACAGAGGAGATTATCTTATGGAC  
ATATCTAAAAGGAGATTATCTTATAGATTCTCTACTATCTTGCAAAGTTTGGATTGCCAA  
CTTTGCACGTGTTGTCGTCAGTTTTTTTTTTAATTTTTAAATTCATTTAATTTATAGA  
TTTTAGCATTTCATCTAAGATTTACATAAGATTTCAATTTCTGAGGATATGGTTTCGATTC  
TGACCTTGGATATGAAAGGAGAAGAGAAAGAAGAAACAAGCGTACCATAAAAAGAGAAGA  
AATAAGAAATACTTTTGGTAAGATCAGAACAGCGTGACTAGTAAAATTAACCTTTAACT  
ATTAAGCTGTAATTTTCATCCTAATTTAATTTACCCCTTAAAAGTATAATATTTTCAA  
AGAAAATTTTGAACCTTTTTATTAACAGCTTATTTGGATGGTTGTACGTATCGGTATTGT  
TTTGATATATACAATATTTGAATAGATTATATTGTTCCCAATCGTTTCATGATGTCATGA  
ACGAATAATATGAAGAATAAACTTGAATATTATAAAGAAAATATAAGGTAAGGTACGAG  
ATAAAATATTTTATAAAAAAATAGGGTAAAGGATAAAATAAAATATTTAATAATAACG  
AAGGACAAGATGAGAGGAAAATATAAGGTAACGACGCGACCACACCAAATCGATCGTTCC  
ATAAAATGATAATTTAACAATACAATAAAAATTTAAATTTCAATCAAATAAAATAT  
TATCTTAAATCGTAACAATAACAATAAAATACTACGTGTAACAACAATCCAAACAAGCAA  
TCAAACACCTACACACAAAACATATAATTAGACCTTGTTAAAATGATTGGAAAAATAAAA  
TCCTACTCCTAGGAATTAAGACTTCTCGATTTATTATATTTTGCATATGTACACAAGT  
CTGGCTCACAATTTTCAACGTTATATATCAGGGAATATTCAACGCCGACACTAGTCTAAC

ATCAACTTCAACAACAGTTTCTTTACACCAACTTTTTAGTATATTACACGCGTGAAATT  
TTATATACACTCAAACACAAAAACAAAACATCAAACTTTTTCCAGTCTTACCACTAC  
ATAAAAAGAAAGAAAATTTTCATCAAATATCATCACTCCCAGTCTCCCAGTCTTAAAG  
TTCCACTTTCTTTTTATCAAAAAATAATAATAATCATACTCCATTTCTTACAACA

>Ntab0920680 Nicotiana tabacum 3KB Upstream sequence, expressed protein, similar to Allene  
oxide cyclase 3, chloroplastic OS=Arabidopsis thaliana GN=AOC3 PE=2 SV=1 TAAAGATGAAA  
TGGTGAAAAAAGGTCACGTTATAAATGATTCAATGATATACTATTGCAAACTTAACAT  
ACTATTACTAATTACCATAGTATTTATTTATTAAGCAAACATTATTATACAGACATAA  
GAAATAGTTTGATTTTTTTAATTGTATTGCATAGCAATTAATGAAAGATTTTAATAAAG  
TTTCATATAAATAAAAATTTCTGTGAATAGCAATAAAGTATTAATATACTTTTAGTATTTCTTATACATATGAATC  
ATTATTGAAATTTCAATTAGTATAAAAAATGATTTGAGCTAATGTATTTTTATTATGTTTAATATTATTAGTTCATT  
TGAAAAAATCCCTTAATAATGAAATATTGTTTAAACGTAAGTCATGTATGTATATAACTAATGATA  
ACAAAAGTAATAAATGCATGTCATATAGCAAGTACCATGTAAAATGAAAAAATATTTAT  
TTTAAAAATAAAAAAGAAATAAATACTAACATTGATGAAAAAATAATATTATACATGTC  
ATATAGCAAGTACCATGTAATAATGAAAAAATATTTATTTAAAAAATAAATACTAA  
CATTGATGAAAAAATATATTATACATGAAATAAAAACATCATAAAGATGCTAGTTATTA  
AACTAGTCAGTTACGCCTAGAAGAATTATTGGTGGGCCACATAATATATAGAGTCTT  
TCAAAAAGGCTTTATACTTATAGCGCATTTCAAAAGGTTTTTATACATATAGCGCATTTT  
AAAGGGACGCTATACTTAACTGGGCAAACGACCATTAAGATATAACGCCGTTTAAAGAG  
CGTTATATATAAATGGTCACCCAATTTTTTTCACACATTTTGGTTATTTGAGTCTAAAA  
GAACCATATTTTGGTTCCGGCCTCCTAGAACTCACAACCTTAGGACATGAAGACTAATAG  
CCTGTTTAGCCAAGTTTTTTTTGGTCAAAGTTTTTTTTCTTTTCAAAGTGCTTTTG  
GCCAAAATTAAGGTGTTTGAAAAAGTATTTTGTGGAGGAGCAGAAGTAGTTTTTGAGA  
AAAAGAAAAATATAGTTTCTATTCAAAGTATTTTTGTGAGAAACACTTTTGAGAAAAAT  
ACACTCAGAAGCAATTTTCAAATTTGATCAAATACTAATTATGTTCAAAGTATTTTTT  
TAAATTAATTAATCAAACAAAATTGATTCTTATTAATAATTTTTTTGAAAGTCATTT  
TTAAAAAATAAATACTTATAAAAAAAGCAGATTTTAGAAGTTTTGACGGATTACAAG  
TCAAAGTCAAAAGCGAGTTTCCCGTAGGCCAATCAAAGCGGCACAGACCACCAAGAA  
CAAAAAACACGTTGAGACACTATTTCCCATTTGGCAAACATTGTTTGTATTCTTA  
GAGAAGACACCTCGAAAGCGTCTTTGACTATTCCAATCTTCCAGTCTCCACTCTCCACA  
CACACAAAACCTCCATTAACACATCGTACCCGTCATCAAATCATGAATCACAGATCTT  
ATACTAATAATAATTTATGATATCCCATTTTCCACACATGGAATTTGGACCCCTCAGC  
ACTATATAGTTAATCACCTTTTATTTTCATCAGCCTCAACAACCCCATTCACCTTTCTATT  
CTAGTCATTTATTTCCCTAAAAAACAACACATTTGCAAGTTCATTCCTCAGCAGCT

>Ntab0512300 Nicotiana tabacum 3KB Upstream sequence, expressed protein, similar to 12-  
oxophytodienoate reductase 3 OS=Solanum lycopersicum GN=OPR3 PE=1 SV=1  
NNNNCCCCTCCCACCCTACCCACCCACCCGAGAACATGACCTTATTCCACCATCACT  
TACCCAGCCATTATAATCTACAGAAAATTACGCTAGAACTACCGCTAAAACAGACAAAAG  
GATTAACATAAAGGAGGCAGGTCTAACACTTACAACCTAACCACTAGAAATGCGTACAA  
ATAAGACAAATAGATAATCAAGAATTAACAAGTGATAACAATATCTTAATAAAAAGGCC  
AACAGAACAGCTACTAAGAAATCAAATTACAGTCTAGAAATCCCAAAATAGTTATTAGCA  
AGAAAAATATCTAGGCAGATGCACTAAATAATTATAGGCAATCAAGAATTAGGCTTAGTG

GGCGTTTGGACATAAGATTTGTAAAATTCAAAAATAGAGGGAAAAAATTTCAAGTGAAAA  
TGGTATTTGAAATTTAAAGTTGTGTTTGAAATGATTATAATTTTAGGTTTTTTGAAGT  
TTTGTGAGTGATTTGAGTGAAAATTTGAAAAACAACCTTTTGGAGTTTTTCAAATTTTC  
GAAAATTTCCAAAATGTATCTTCAAGTGAAAATTTGAAAATTTTATGAACAAACGCTGATT  
TTGAAAAAAAAGTGTCTTTTTGAAAAAAAAGAAAAATTTCTTATGTCCAAAAGG  
GCTCTTAACTAACGCAAACTAATTGGATACTAACAAGGGAGACAAAGATATTAACGAA  
AAACAGAAGGTACCAACTCCTGATTAGTGCGAAACCTAGGTAAATCGTGGTAAATGTCAA  
GGTCATGCTACCGCATAACCTTAGTCAATTAATAATATTAATTTCTAAAAATATA  
TATATTTGTATATATAAAAAGTTTATCGAATTTTATGGATGCTTTTGACCCCTTACCTA  
TAGCATCGGTCCGCGTCTGTGGTCAAATATAATAAACTTTCTCGGATAAGTGAAGTGAA  
TTTTTTTTAATAAAAATTGCGGTAAGATTCGCCGCAACAAAGACAAGACCTATGCATAC  
AAATGAATTTATTCCACCGTACACAAGTACAAGTGCCGTCAATAATGTAGACAAACGT  
GCAAATTTTAGTATAATAGAATTTAACAATAAAAAATAAAAAGGAATATAAAATGAGA  
GTAAGATCACATGGTAACAATATGTTTCTTAGTCATAATCAGATCTAACAAATCAAGCTA  
ACATATATTTATAATTAAGTACTACATCAACTGGACTAAAACTTGAGCCAAAAGCTT  
TATAAGAAAAAAGGATAATATAAAATTGAATAGTACGTAACCCAAAAGTCACTGGAGTT  
AGAATTTGTGATATTGTTGTCCAAGCTTTGGATTTTGTATATCAGATGATTATATATAAA  
AAAATGTAGTTATGCAAAAAATCAACAAATCATAAAAAATAAATAAGCATATGACTTAT  
ATATAAGTACTTACAAATGATATTAGTAAATACTTATTTACAGTTGATATTTATAGTTTT  
ATACCAAATAAAAATAATCATATCTTAAGCATCACAAAGTTTAAAAAGTGAAAAGACATACT  
ATATAATTATCATTTGACAATACTCAGTATTAATTAATTTTATCTGTGCAAATTACAT  
GTAACCTAGTGTTAATGATAATTGCCCGATCATTAGTTAGCAGAGTTACGATGATAAGCG  
ATAGGCACCCGATAAAAACAATCAAGACATGCAAGTAGACCGAATACGATTCTACAAAATA  
TTGACCGAATACATTAACGTTGGTGGTGTGCCCCTTGACCCTGCTGAANNNNNNNNNN  
NNNNNNNNNNNNNNNNNTGAACGCGAAATACTTTGTACACCAGACTATCTTTTAGTAT  
CGACCGAATATGATACTAAAATATCGACCGAATACATCACACCCTTGGTGGTACAACCC  
TTTCTAGACACTACATGAATGCGAGATACTTTGATTTGTGCACCGACTACCTTTTAAAT  
GTCGATCAAACACGATACTAAAACGCAAGATGCTTTGTGCACCAGACTACCTTTTATTGT  
CGATCGAATACGATACTAAAATGTCAACCGAACACAGCACACCCTTGGTGGTACAACCC  
TTTCTAGACACTACATGAACGCGATATACTTTAATTTGTGCATCGGACTATCTTTTAGT  
GTCGATCGAATACAATACTAAAACGCAAGATGCTTTGTGCACCAGACTACCTTTTATTGT  
CGATCGAATACGATACTAAAATGTCAACCGAACACATCACACCCTTGGTGGTACAACCC  
TTTCTAGACACTACATGAATGCGATATACTTTAATTTGTGCACCAGACTACCTTTTATTGT  
GTCGATCGAACACGATACTAAAACACAAGATGCTTTGTGCATCAGACTACCTTTTATTGT  
CGACCGAATAAGATACTAAAATGTCAACCGAATACATCACACCCTTGGTGGTACAACCC  
TTCTGGATCCTGCATAAAAGCGAGATGCTTTTACACCAGACTACTTATATATTATACG  
ATACGAAAAATAATGTTAACCGAATACATCACACCCTTGGTGGTACAATCTTTTCTAGA  
TCTTCCATGAATGCGAGATGTTTTGTGCACCAGATTACCTTGTGATTGACCGGATACA  
ACACTAATTTTTTTTTTTTTTTTTGCAACCTCCTTCGTGGTAGCTGCATATATATAT  
AGTTAAAATAGACCAATAAGATCCAGAAATCTATAGTCAAACCATGTACATTATTTATT  
CATGTCAATATTTCCATATGAACAGCGTGCCTCACTATTGTTTCTTGACTTATCAATT  
CTAAGTCCACGAAAACGACCTTCACTAATTACTGCACAGTCCACCTTCTTATGCCGTCC  
AATCTCACCATTAATCATAGCTCCATTTACCAATATTTCTTTGTAGCCAATTCTCCTA  
AACAAATTTGAAAAATAGAAGAAAACAAAAACATAATCCTCACTCTTCTCTCCTCAGCA
