# Supplementary material for: High Temperature Induces Expression of Tobacco Transcription Factor NtMYC2a to Regulate Nicotine and JA Biosynthesis
Source: PubMed Central journal article supplement (PMC5081390; doi:10.3389/fphys.2016.00465), 2016-10-27
Supplement: Presentation3.pdf [file Presentation3.pdf]

>NtPMT1 promoter sequence

GTATACCAAAAATCAATTCAACCCCAAAACATAATACAACCAATGTTAATGCAATA  
TCTCTGCTGCTA **TCACGAAGATAATTGTAGCTCACGAAAGTAGGATACATTATGTAGG**  
**TTACATCACATAGAGGTAATCTAAAGCTCCCAATAATAAGATGTGTAATGTTGATTAT**  
**GTAGAAATTTGCCAGGTTATTTAGAATAAACAAGAAGAGGAGAAAAAAGTACAATT**  
**TACCTGAACTCTTGAATGTATCCTACAAATAACCTAGACTTCATGG**  
ACGTCAGTTGTCAGTTTACTTTTGTTTAATGGTACATCATTGTCAAATACTTTATTT  
GGATAAAAAC **AGTTTTGCCTAAGGAGTAAACAGATCCGGAGTAAGAAAGCAGACGA**  
**TTAAAGCAATTTTAAAAAAGGAGAGAGAAATTAATGAGCACACACATATACTAGTG**  
**AAATTAGGGTACTAATTTACTAATAATTGCACCGAGACAACTTATATTTTAGTTCCA**  
**AAATGTCAGTCTAACCCTG **CACGTT** GTAATAAATTTTAACTCTAT**  
**TATATTATATCGAGTTGCGCCCTCCACTCCTCGGTGTCCAAATTGTATTTAAATGCATA**  
**GATGTTTAATGGGAGTGTACAGCAAGCTTTCGGAAAATACAAACCATAAATACTTTCTC**  
**TTCTTCAATTTGTTTAGTTTAATTTGAAAATGGAAGTCATATCTACCAACACAAATG**  
**GCTCTACCATCTTCA**
